# Supplementary material for: A relationship between the force curve measured by atomic force microscopy in an ionic liquid and its density distribution on a substrate
Source: Royal Society of Chemistry journal article supplement (doi:10.1039/c7cp06948k), 2017-01-01
Supplement: c7cp06948k1.pdf [file c7cp06948k1.pdf]

## Electronic Supplementary Information (ESI)

### Relationship between Force Curve Measured by Atomic Force Microscopy in Ionic Liquid and its Density Distribution on a Substrate

Ken-ichi Amano,<sup>a\*</sup> Yasuyuki Yokota,<sup>b</sup> Takashi Ichii,<sup>c</sup> Norio Yoshida,<sup>d</sup> Naoya Nishi,<sup>a</sup> Seiji Katakura,<sup>a</sup> Akihito Imanishi,<sup>e</sup> Ken-ichi Fukui,<sup>e</sup> and Tetsuo Sakka<sup>a</sup>

<sup>a</sup> *Department of Energy and Hydrocarbon Chemistry, Graduate School of Engineering, Kyoto University, Kyoto 615-8510, Japan.*

*E-mail: amano.kenichi.8s@kyoto-u.ac.jp*

<sup>b</sup> *Surface and Interface Science Laboratory, RIKEN, Saitama 351-0198, Japan*

<sup>c</sup> *Department of Materials Science and Engineering, Kyoto University, Kyoto, 606-8501, Japan*

<sup>d</sup> *Department of Chemistry, Graduate School of Science, Kyushu University, Fukuoka 819-0395, Japan*

<sup>e</sup> *Department of Materials Engineering Science, Graduate School of Engineering Science, Osaka University, 1-3 Machikaneyama, Toyonaka, Osaka 560-8531, Japan*

## Figure and Tables

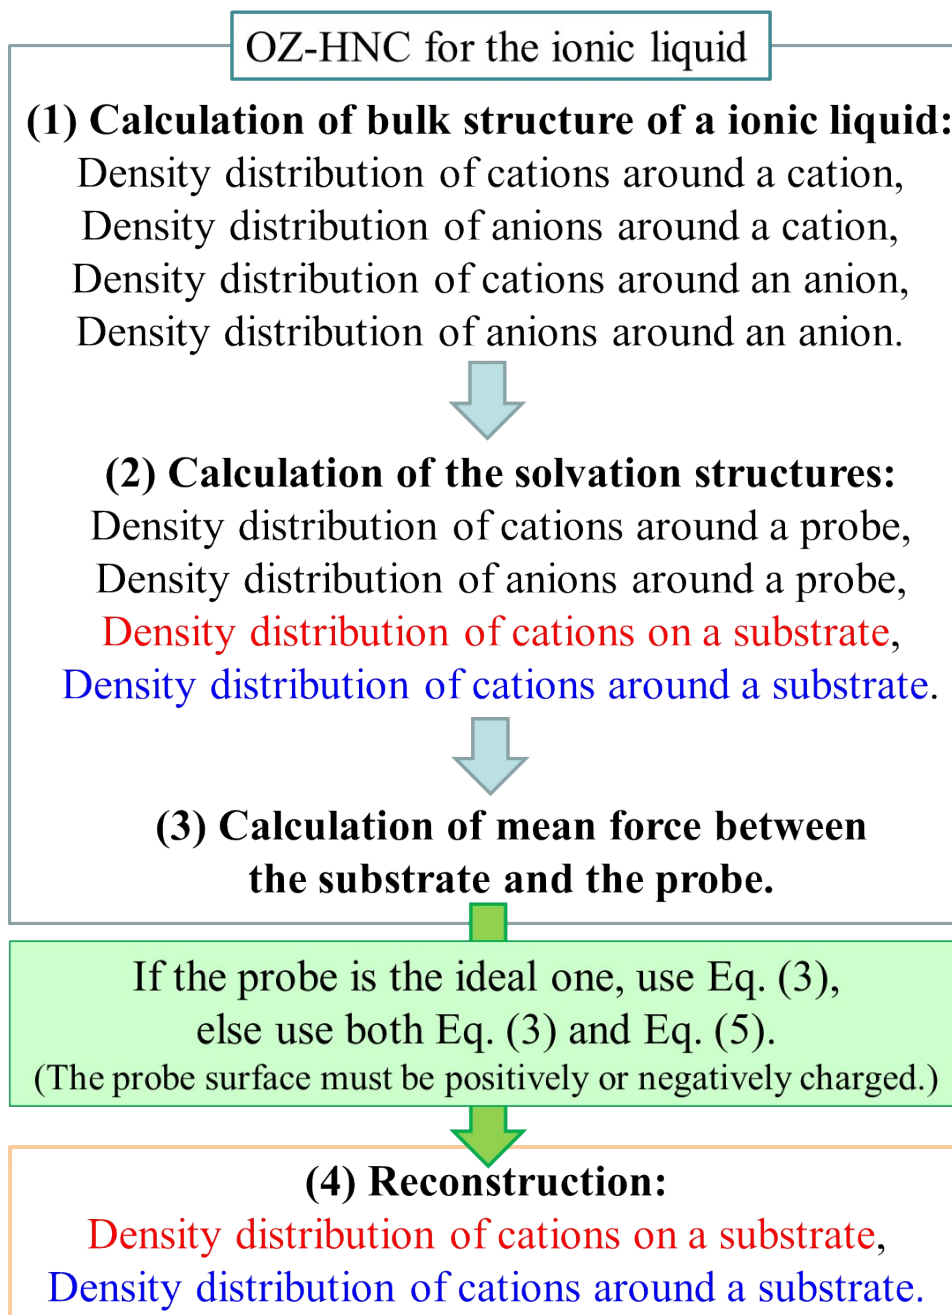

Fig. S1 Overview of the calculation process.

**Table S1** Values of  $C^*$  for conditions written in Fig. 7, where  $\sigma_B = 0$ . The value of  $C^*$  increases with increase in  $d_p$ . The value of  $C^*$  for large  $|\sigma_p|$  is smaller than that for small  $|\sigma_p|$ .

| $d_p$ (m) | $\sigma_p$ (C/nm <sup>2</sup> ) | $C^*$  |
|-----------|---------------------------------|--------|
| $2d_0$    | $\pm\sigma_0$                   | 0.4356 |
| $2d_0$    | $\pm\sigma_0/2$                 | 0.8553 |
| $3d_0$    | $\pm\sigma_0$                   | 0.3088 |
| $3d_0$    | $\pm\sigma_0/2$                 | 0.7944 |
| $4d_0$    | $\pm\sigma_0$                   | 0.2431 |
| $4d_0$    | $\pm\sigma_0/2$                 | 0.7459 |

**Table S2** Values of  $C^*$  for conditions written in Fig. 8(a), where  $\sigma_B = -\sigma_0$ . The value of  $C^*$  decreases with increase in  $d_p$ . The value of  $C^*$  for large  $\sigma_p$  is larger than that for small  $\sigma_p$ .

| $d_p$ (m) | $\sigma_p$ (C/nm <sup>2</sup> ) | $C^*$  |
|-----------|---------------------------------|--------|
| $2d_0$    | $+\sigma_0$                     | 0.8312 |
| $2d_0$    | $+\sigma_0/2$                   | 0.4324 |
| $3d_0$    | $+\sigma_0$                     | 0.5413 |
| $3d_0$    | $+\sigma_0/2$                   | 0.2798 |
| $4d_0$    | $+\sigma_0$                     | 0.4094 |
| $4d_0$    | $+\sigma_0/2$                   | 0.2107 |

**Table S3** Values of  $C^*$  for conditions written in Fig. 8(b), where  $\sigma_B = -\sigma_0$ . The value of  $C^*$  decreases with increase in  $d_p$ . The value of  $C^*$  for large  $|\sigma_p|$  is larger than that for small  $|\sigma_p|$ .

| $d_p$ (m) | $\sigma_p$ (C/nm <sup>2</sup> ) | $C^*$  |
|-----------|---------------------------------|--------|
| $2d_0$    | $-\sigma_0$                     | 0.8273 |
| $2d_0$    | $-\sigma_0/2$                   | 0.4237 |
| $3d_0$    | $-\sigma_0$                     | 0.5563 |
| $3d_0$    | $-\sigma_0/2$                   | 0.2762 |
| $4d_0$    | $-\sigma_0$                     | 0.4311 |
| $4d_0$    | $-\sigma_0/2$                   | 0.2116 |
